# Supplementary material for: Hsp90 Stabilizes SIRT1 Orthologs in Mammalian Cells and C. elegans
Source: PubMed Central journal article supplement (PMC6274930; doi:10.3390/ijms19113661), 2018-11-20
Supplement: ijms-19-03661-s001.pdf [file ijms-19-03661-s001.pdf]

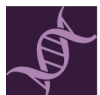

## Supplementary Material

# **Hsp90 stabilizes SIRT1 orthologs in mammalian cells and *C. elegans***

Minh Tu Nguyen, Milán Somogyvári and Csaba Sóti\*

*Department of Medical Chemistry, Semmelweis University, Budapest, Hungary, H-1094*

\*Correspondence: [soti.csaba@med.semmelweis-univ.hu](mailto:soti.csaba@med.semmelweis-univ.hu);

Tel.: + 36 1 4591500 extn. 60130

This file includes: Supplementary Figure S1 and Legend.

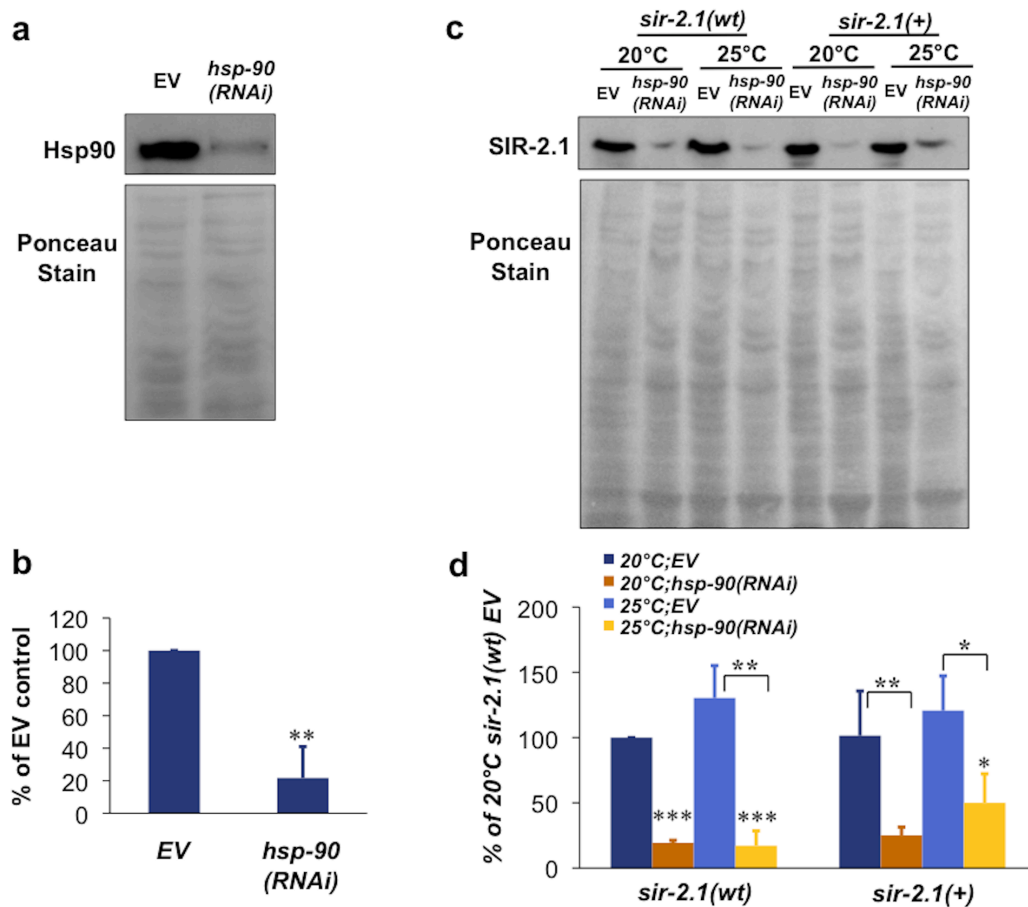

**Figure S1** Hsp90 knockdown depletes SIR-2.1 protein levels in a low copy overexpressor *C. elegans* strain. **(a)** *hsp-90(RNAi)* downregulates Hsp90 protein level. Western blots of lysates from young adult N2 wildtype nematodes treated with *hsp-90(RNAi)* or empty vector (EV) from hatching. Worms were kept at 20°C. Images are representatives of three experiments. **(b)** Quantification of protein levels from the experiment shown in panel (a). Values are means  $\pm$  S.D. of three experiments and were statistically compared with the EV control. \* $P < 0.01$ , by two-tailed unpaired *t*-test. **(c)** *hsp-90(RNAi)* depletes SIR-2.1 protein in the low copy transgenic *sir-2.1* and its background strain. Western blots of lysates from young adult SCS004 *sir-2.1(wt)* and SCS003 *sir-2.1(+)* nematodes treated with *hsp-90(RNAi)* or empty vector (EV) from hatching. Worms were kept at 20 or 25°C. Images are representatives of three experiments. **(d)** Quantification of protein levels from the experiment shown in panel (a). Values are means  $\pm$  S.D. of three experiments and were statistically compared with the respective EV controls. \* $P < 0.05$ , \*\* $P < 0.01$ , \*\*\* $P < 0.001$  by two-tailed unpaired *t*-test.

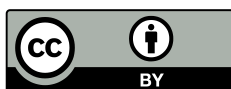

© 2018 by the authors. Submitted for possible open access publication under the terms and conditions of the Creative Commons Attribution (CC BY) license (<http://creativecommons.org/licenses/by/4.0/>).
